# Supplementary material for: Sensitivity of Yeast Mutants Deficient in Mitochondrial or Vacuolar ABC Transporters to Pathogenesis-Related Protein TcPR-10 of Theobroma cacao
Source: PubMed Central journal article supplement (PMC6022951; doi:10.3390/biology7020035), 2018-06-13
Supplement: biology-07-00035-s001.pdf [file biology-07-00035-s001.pdf]

Supplementary Table S1.

Statistical analysis of data of Figure 5. Two way ANOVA, Sidak's and Tukey's multiple comparison test.

|                      | <b>necrosis x late necrosis</b> |                  | <b>necrosis x apoptosis</b> |                  | <b>late necrosis x apoptosis</b> |                                                                                      |
|----------------------|---------------------------------|------------------|-----------------------------|------------------|----------------------------------|--------------------------------------------------------------------------------------|
| <b>BY4742</b>        | ns                              |                  | ns                          |                  | ns                               |                                                                                      |
| <b>BY4742 Tc</b>     | ns                              |                  | *                           |                  | ns                               |                                                                                      |
| <b>BYmdl1</b>        | ns                              |                  | ns                          |                  | ns                               |                                                                                      |
| <b>BYmdl1 Tc</b>     | ns                              |                  | ns                          |                  | ns                               |                                                                                      |
| <b>BYnft1</b>        | ns                              |                  | ns                          |                  | ns                               |                                                                                      |
| <b>BYnft1 Tc</b>     | ns                              |                  | *                           |                  | **                               |                                                                                      |
|                      |                                 |                  |                             |                  |                                  |                                                                                      |
|                      | <b>BY4742 x BY4742 Tc</b>       |                  | <b>BYmdl1 x BYmdl1 Tc</b>   |                  | <b>BYnft1 x BYnft1 Tc</b>        |                                                                                      |
| <b>necrosis</b>      | ns                              |                  | ns                          |                  | ns                               |                                                                                      |
| <b>late necrosis</b> | ns                              |                  | ns                          |                  | ns                               |                                                                                      |
| <b>apoptosis</b>     | *                               |                  | ns                          |                  | ns                               |                                                                                      |
|                      |                                 |                  |                             |                  |                                  |                                                                                      |
|                      | <b>BY4742</b>                   | <b>BY4742 Tc</b> | <b>BYmdl1</b>               | <b>BYmdl1 Tc</b> | <b>BYnft1</b>                    | <b>BYnft1 Tc</b>                                                                     |
| <b>BY4742</b>        | ns                              | ns               | ns                          | ns               | ns                               | late necrosis x apoptosis, *                                                         |
| <b>BY4742 Tc</b>     | ns                              | ns               | apoptosis x apoptosis, *    | ns               | ns                               | ns                                                                                   |
| <b>BYmdl1</b>        | ns                              | ns               | ns                          | ns               | ns                               | necrosis x apoptosis, *<br>late necrosis x apoptosis, *<br>apoptosis x apoptosis, ** |
| <b>BYmdl1 Tc</b>     | ns                              | ns               | ns                          | ns               | ns                               | necrosis x apoptosis, *<br>late necrosis x apoptosis, *<br>apoptosis x apoptosis, *  |
| <b>BYnft1</b>        | ns                              | ns               | ns                          | ns               | ns                               | necrosis x apoptosis, *<br>late necrosis x apoptosis, *                              |

|                         |    |    |    |    |    |    |
|-------------------------|----|----|----|----|----|----|
| <b><i>BYnft1</i> Tc</b> | ns | ns | ns | ns | ns | ns |
|-------------------------|----|----|----|----|----|----|
